# Supplementary material for: Unravelling B cell heterogeneity: insights into flow cytometry-gated B cells from single-cell multi-omics data
Source: PubMed Central journal article supplement (PMC11067501; doi:10.3389/fimmu.2024.1380386), 2024-04-18
Supplement: Presentation_1.pdf [file Presentation_1.pdf]

**Theme:** Unswitched Memory B cells in Human Health and Disease

**Title:** *Unravelling B cell heterogeneity: Insights into flow cytometry-gated B cells from single-cell multi-omics data*

Jane I. Pernes<sup>\*1,2</sup>, Atheer Alsayah<sup>\*1,3</sup>, Felicia Tucci<sup>1,4</sup>, Rachael J. M. Bashford-Rogers<sup>1,4</sup>

\*Joint first authors.

<sup>1</sup>Department of Biochemistry, South Parks Road, University of Oxford, Oxford, OX1 3QU, UK

<sup>2</sup> Wellcome Centre for Human Genetics, University of Oxford, Oxford, UK

<sup>3</sup>Applied Genomic Technologies Institute, King Abdulaziz City for Science and Technology (KACST), Riyadh, Saudi Arabia.

<sup>4</sup>Oxford Cancer Centre, Oxford, UK

**Corresponding author:** Rachael Bashford-Rogers ([rachael.bashford-rogers@bioch.ox.ac.uk](mailto:rachael.bashford-rogers@bioch.ox.ac.uk)).

**Supplemental Figures**

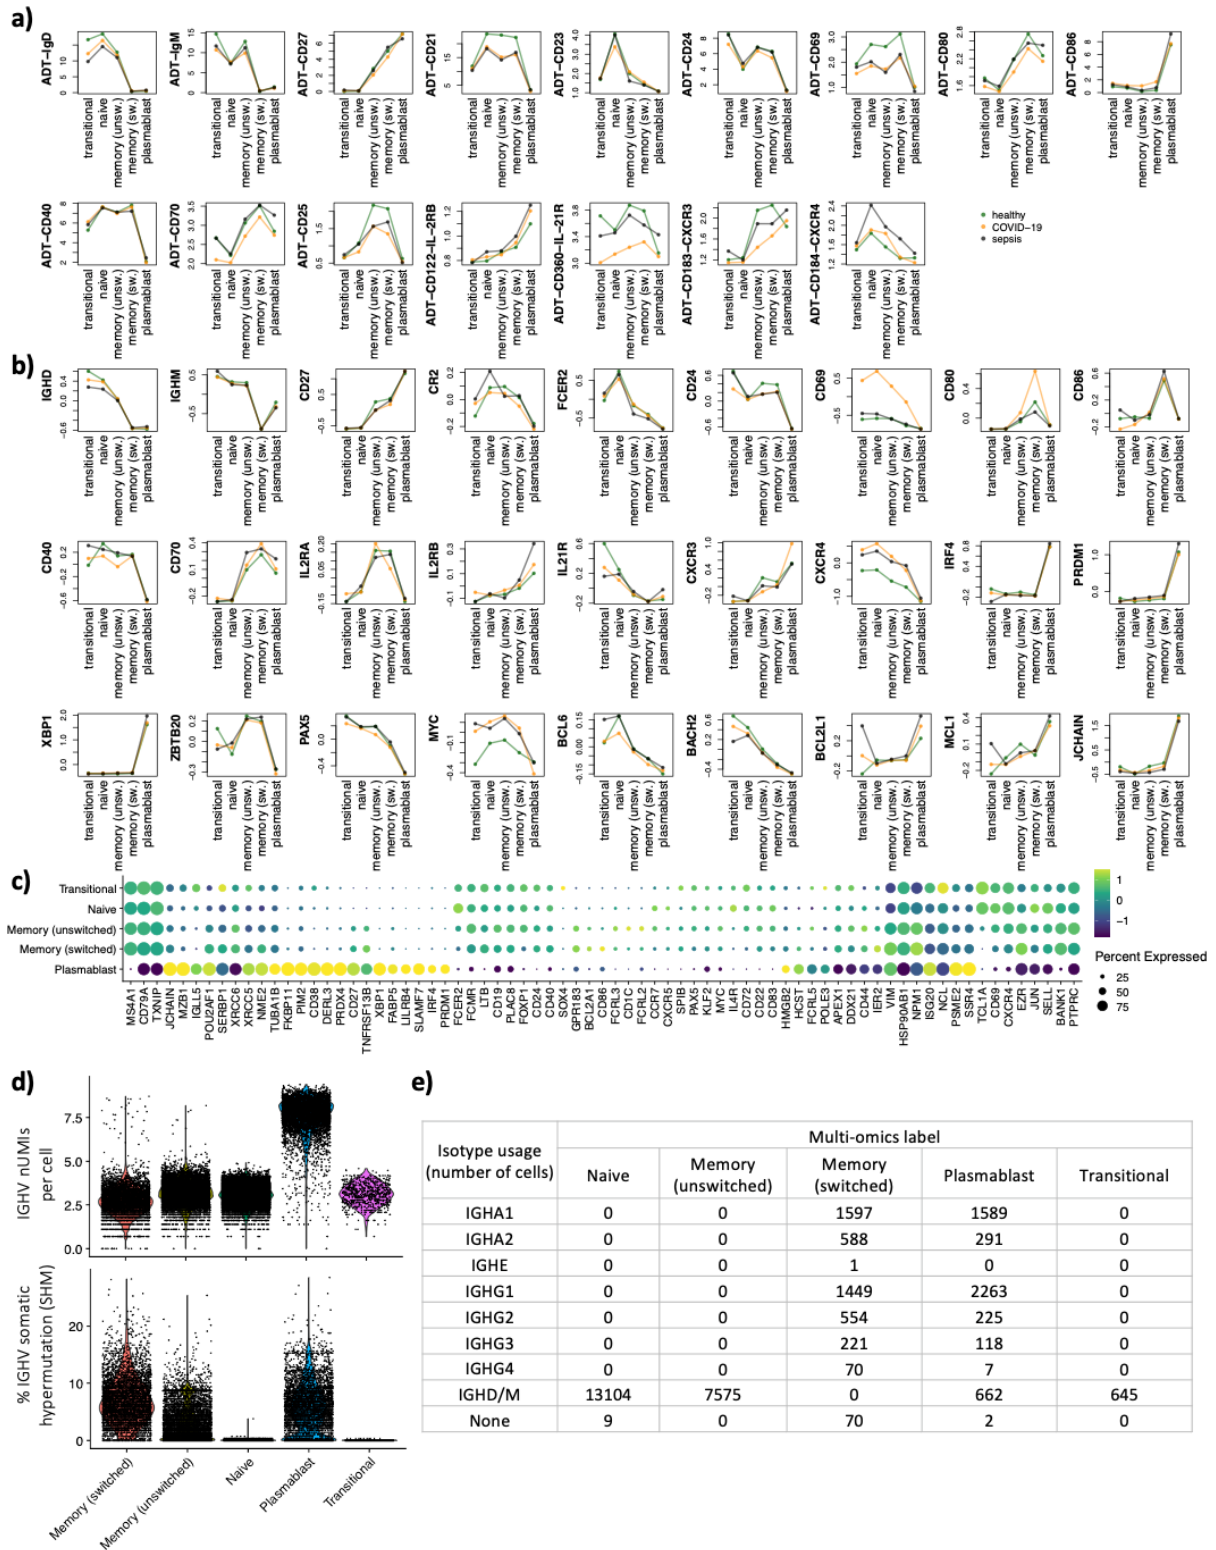

**Figure S1. Gene expression and VDJ signatures for the single cell multi-omics B cell annotations.**

a) Gene expression profiles of B cell subpopulations of the top differentially expressed and marker genes.

b) The per cell subpopulation (left) somatic hypermutation levels (SHM) and (right) IGHV expression level (nUMIs). Naïve and transitional B cells are marked by low/zero SHM and plasmablasts have the highest IGHV expression.

c) The isotype usage percentages across cell types within each cell population. Naïve, transitional B cells and unswitched activated and memory B cells are marked by IGHD/IGHM expression, with only class-switched B cells within the other populations.

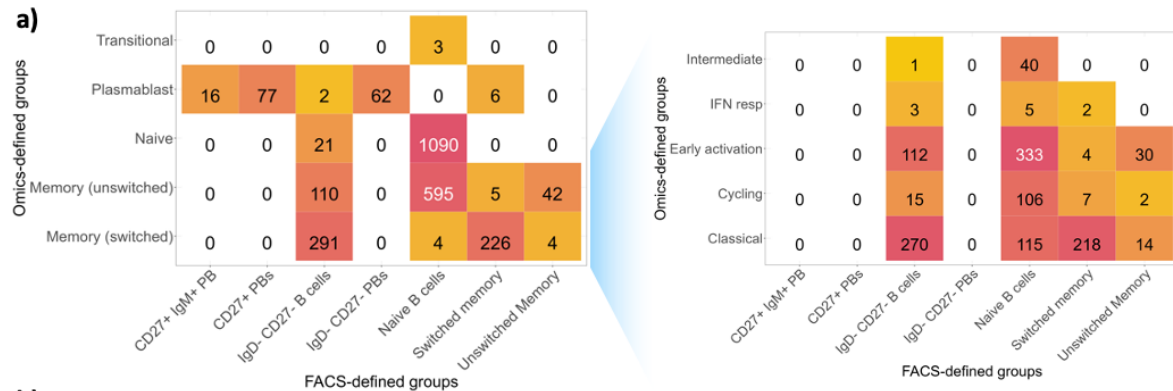

**b)**

| FACS-defined group                        | True multi-omics label population | % Accuracy | % Sensitivity | % Specificity | % Purity |
|-------------------------------------------|-----------------------------------|------------|---------------|---------------|----------|
| CD27+ IgM+ PBs, CD27+ PBs, IgD- CD27- PBs | Plasmablast                       | 99.69      | 95.09         | 100           | 100      |
| Naive B cells                             | Naive                             | 75.61      | 98.11         | 58.28         | 64.42    |
| Switched memory                           | Memory (switched)                 | 87.86      | 43.05         | 99.46         | 95.36    |
| Unswitched Memory                         | Memory (unswitched)               | 72.04      | 5.59          | 99.78         | 91.3     |

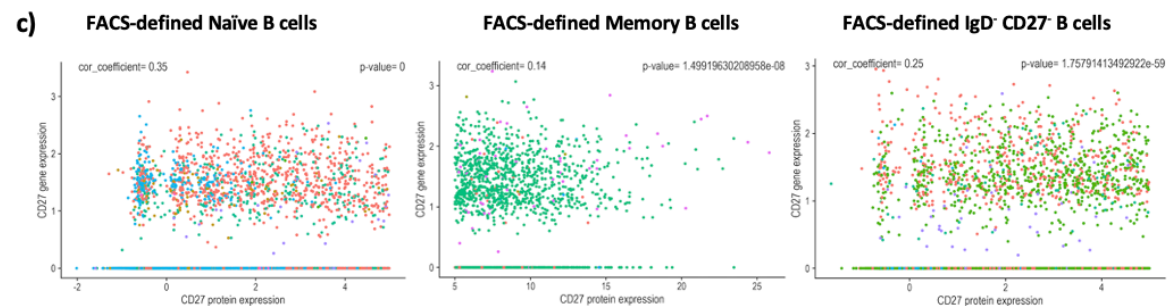

**Figure S2.**

a) Heatmap of the heterogeneity of B cells captured within each standard B cell flow cytometric-style gating for only healthy individuals. The number represents the number of cells captured with in the corresponding flow-cytometric gate with the corresponding multi-omics label.

b) Table of the accuracy, sensitivity and specificity of the flow cytometric-style gating to capture target B cell populations for only healthy individuals, where the true annotations were defined using the multi-omics labelling.

c) The correlation between CD27 protein and gene expression within cell subsets. Correlations were performed using Spearman Rank with the corresponding p-values.

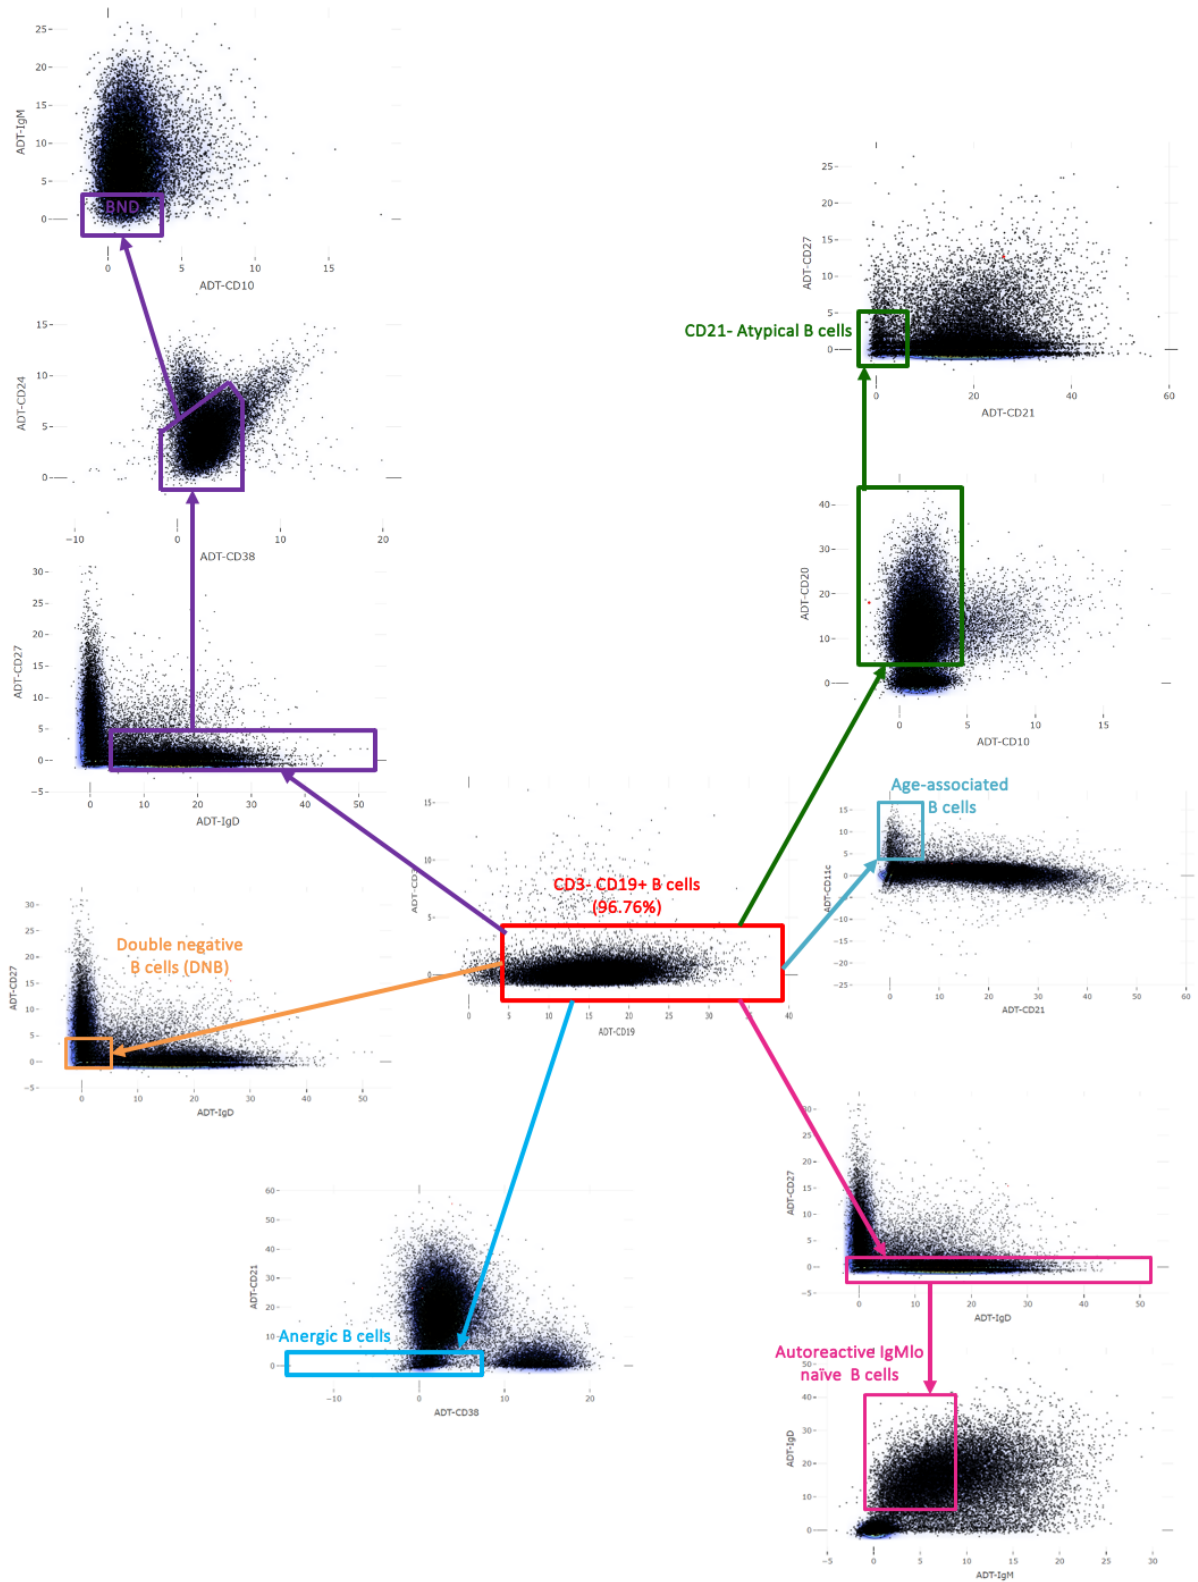

**Figure S3.** Gating for the anergic, age-associated, B<sub>ND</sub>, CD21- atypical, and DNB B cells, and autoreactive IgM<sub>lo</sub> naïve B cells based on flow cytometric gating strategies used in the literature from (Figure 4a).

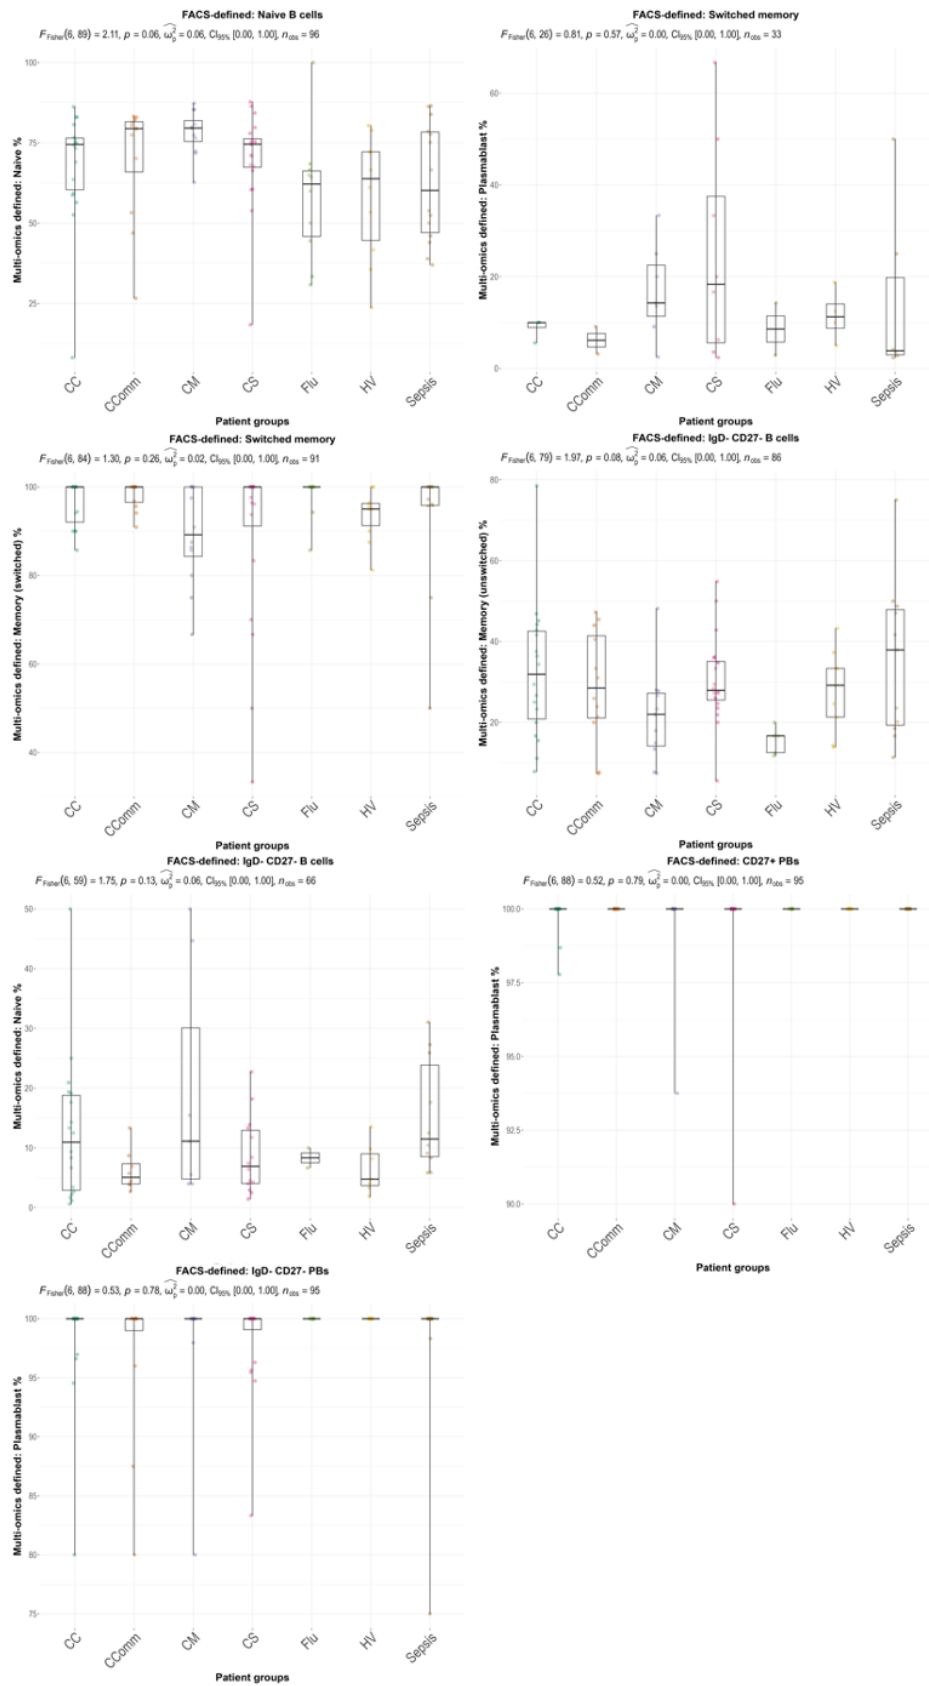

**Figure S4.** Boxplots of the variation of the proportion of multi-omics-defined B cell populations within flow-cytometric style gating between diseases for naïve B cells, unswitched and switched memory B cells, IgD- CD27- B cells, CD27+ IgM+ plasmablasts, CD27+ plasmablasts and IgD- CD27- plasmablasts.

Overall p-values of frequencies associating with disease status is provided at the top of each figure (by ANOVA) and p-values between disease states are provided (by Wilcoxon test using Holm multiple testing correction).

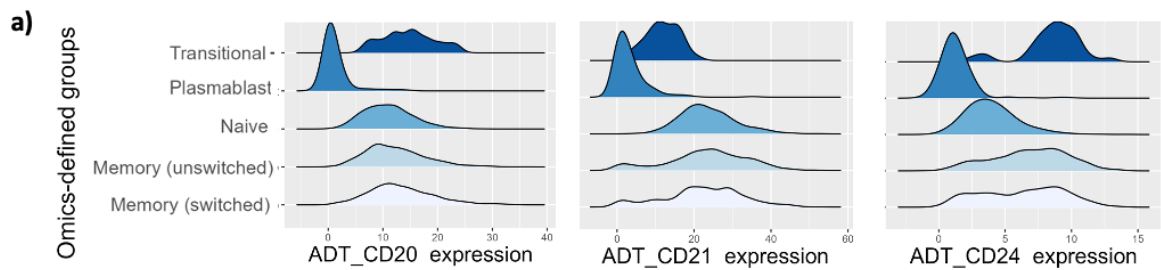

**b)** Relative change in percentage of cells with additional gates 1-3 compared to the gating in Figure 1 (without CD20, CD21 and CD24 gates):

| Multi-omics defined labels | FACS-defined groups                              |                                              |                              |
|----------------------------|--------------------------------------------------|----------------------------------------------|------------------------------|
|                            | Naive B cells<br>(CD20lo/mid CD24lo/mid CD21mid) | Switched memory<br>(CD24+ CD20lo/mid CD21hi) | Unswitched Memory<br>(CD24-) |
| Transitional               | -0.127                                           | NA                                           | NA                           |
| Plasmablast                | -0.373                                           | -1.000                                       | -1.000                       |
| Naive                      | -0.052                                           | NA                                           | NA                           |
| Memory (unswitched)        | -0.246                                           | -0.214                                       | -0.635                       |
| Memory (switched)          | -0.184                                           | -0.290                                       | -0.840                       |

**c)**

| FACS-defined population                  | Multi-omics defined population | p-value (significance of % FACS impurity associated with disease status) using gating from Figure 6 |
|------------------------------------------|--------------------------------|-----------------------------------------------------------------------------------------------------|
| IgD-CD27- B cells (CD24-CD20hiCD21-)     | Memory (switched)              | 4.21E-03                                                                                            |
| IgD-CD27- B cells (CD24-CD20lo)          | Memory (switched)              | 0.83                                                                                                |
| IgD-CD27- B cells (CD24CD20lomidCD21hi)  | Memory (switched)              | 1.06E-03                                                                                            |
| Nave B cells (CD20lomidCD24lomidCD21mid) | Memory (switched)              | 0.02                                                                                                |
| Switched memory(CD24-)                   | Memory (switched)              | 0.24                                                                                                |
| Switched memory(CD24CD20lomidCD21hi)     | Memory (switched)              | 0.71                                                                                                |
| Unswitched Memory(CD24CD20lo)            | Memory (switched)              | NA                                                                                                  |
| IgD-CD27- B cells (CD24-CD20hiCD21-)     | Memory (unswitched)            | 0.91                                                                                                |
| IgD-CD27- B cells (CD24CD20lomidCD21hi)  | Memory (unswitched)            | 0.11                                                                                                |
| Nave B cells (CD20lomidCD24lomidCD21mid) | Memory (unswitched)            | 8.94E-04                                                                                            |
| Unswitched Memory(CD24CD20lo)            | Memory (unswitched)            | 0.34                                                                                                |
| IgD-CD27- B cells (CD24-CD20hiCD21-)     | Naive                          | 0.04                                                                                                |
| Nave B cells (CD20lomidCD24lomidCD21mid) | Naive                          | 0.07                                                                                                |
| Nave B cells (CD20lomidCD24lomidCD21mid) | Plasmablast                    | 0.28                                                                                                |
| Switched memory(CD24-)                   | Plasmablast                    | 0.57                                                                                                |
| Unswitched Memory(CD24-)                 | Plasmablast                    | NA                                                                                                  |

**Figure S5.** a) The distribution of CD20, CD21 and CD24 expression across cells defined by multi-omics.

b) Relative change in frequency with additional gates from Figure 6 compared to the gating in Figure 1 (without the additional CD20, CD21 and CD24 gates). The relative change value is between -1 to 0 where -1 represents a complete reduction of a population after the additional gating, and zero represents identical frequencies after the additional gating.

c) Table of the variation of the significance (p-value) of association of the percentage of cells labelled via multi-omics-definitions within flow-cytometric style gating between diseases. Overall p-values (calculated by ANOVA) of frequencies associating with disease status is provided only for combinations with >3 individuals with non-zero frequencies across each disease state. Significant values (p-values<0.05) are highlighted in red.
